# Supplementary material
Source: Springer Nature journal article supplement (https://www.springermedizin.de/resource/supplementary/12885_2012_3765_MOESM2_ESM.pdf/9464400)
Supplement: MOESM2 [file 9464400]

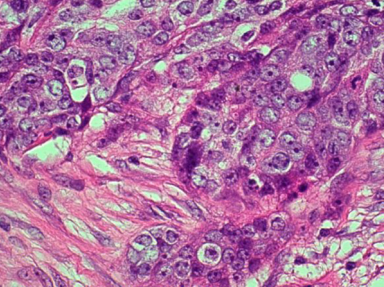

**A.** Poorly differentiated adenocarcinoma of right ovary

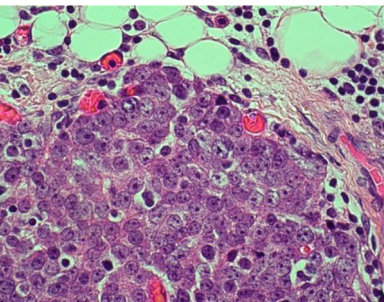

**B.** Omental metastasis

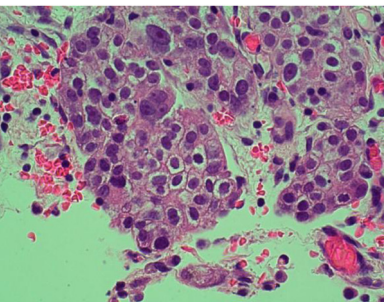

**C.** Recurrent ovarian carcinoma
